# Supplementary material
Source: PubMed Central journal article supplement (PMC4026213)
Supplement: Supp_Data.pdf [file Supp_Data.pdf]

## Supplementary Data

### Supplementary Methods

#### *Western blot analysis*

A total of 1  $\mu$ g of each reaction, calculated using the Schaffner and Weissmann method (53), were prepared in NuPAGE<sup>®</sup> LDS sample buffer (4 $\times$ ) and loaded on to a NuPAGE Novex 4%–12% Bis-Tris 1 mm gel. Proteins were separated with 1 $\times$  NuPAGE MES SDS running buffer for 1 h at 200 V. The proteins were transferred overnight at 4°C to a hybond nitrocellulose enhanced chemiluminescence membrane in an XCell II<sup>™</sup> blot module in 1 $\times$  NuPAGE transfer buffer adjusted to contain 10% methanol. The membranes were prepared for immunoblotting by blocking with 5% nonfat milk powder in 1 $\times$  Tris buffer saline with tween (TBST), pH 7.5. Primary antibody (1/5000 for both human branched-chain aminotransferase [hBCAT] proteins) was prepared in 5% nonfat milk powder in 1 $\times$  TBST and incubated overnight at 4°C before several washes with 1 $\times$  TBST.

Secondary antibody (1/5000) linked with horse radish peroxidase (HRP) was added for 45 min at room temperature and then washed with 1 $\times$  TBST. The positive bands were visualized using BM chemiluminescent HRP substrate and imaged using Alpha Innotech Fluorchem Q system.

#### *Expression and measurement of hBCAT specific activity*

The hBCAT and mutant proteins were overexpressed and purified as previously described (16, 18). The transaminase activity of these proteins was measured as previously described by Conway *et al.* (16, 17). Briefly, BCAT activity in all samples was measured at 37°C in a buffer containing 25 mM potassium phosphate (pH 7.8), 5 mM DTT, 1 mM [1-<sup>14</sup>C] keto isovalerate, and 0.25 mM pyridoxal 5-phosphate. A unit of hBCAT activity was expressed as 1  $\mu$ mol of <sup>14</sup>C-valine formed min<sup>-1</sup> at 37°C. All assays were performed in triplicate.
