# Supplementary material
Source: PubMed Central journal article supplement (PMC4026213)
Supplement: Supp_Fig1.pdf [file Supp_Fig1.pdf]

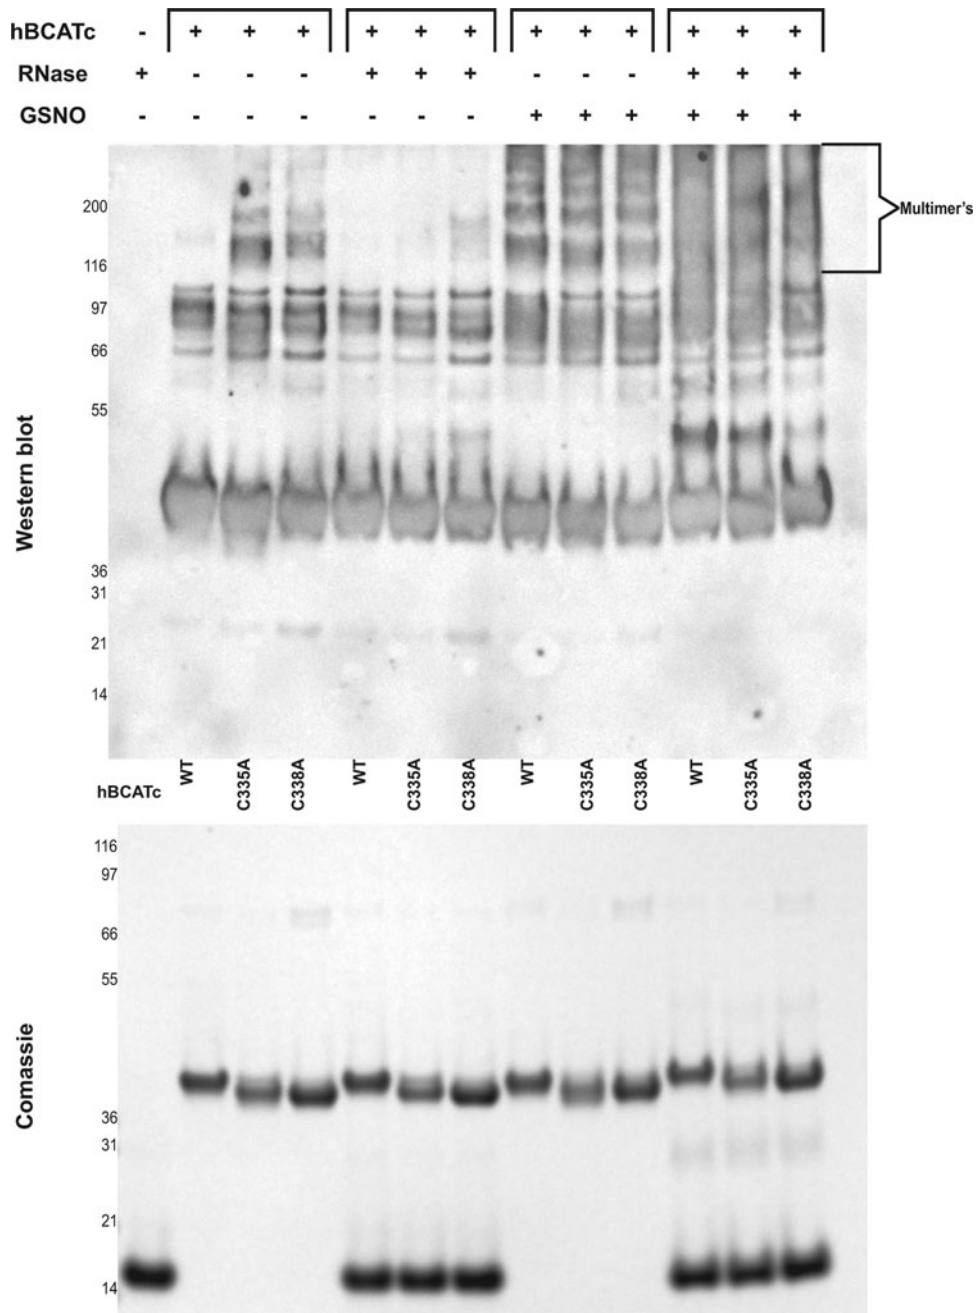

**SUPPLEMENTARY FIG. S1. Thiols of the CXXC motif are integral to the oxidase activity of human branched-chain aminotransferase (hBCAT), which is mediated by S-glutathionylation.** Aliquots of each refolding reaction + / - S-nitroso-glutathione (GSNO) were separated on a 4%–12% nonreducing sodium dodecyl sulfate polyacrylamide gel electrophoresis (SDS-PAGE), where hBCATc was detected by Western blot analysis (antibody dilution 1/5000). Western blot (*Upper panel*) and Coomassie stain (*Lower panel*) analysis of hBCATc with reduced denatured ribonuclease A (rdRNase) + / - GSNO. Lanes, as indicated, correspond to hBCATc, N-terminal mutant, and C-terminal mutant, respectively, under the described conditions. Multimers formed during the refolding reaction are indicated.
