# Supplementary material
Source: PubMed Central journal article supplement (PMC4026213)
Supplement: Supp_Fig2.pdf [file Supp_Fig2.pdf]

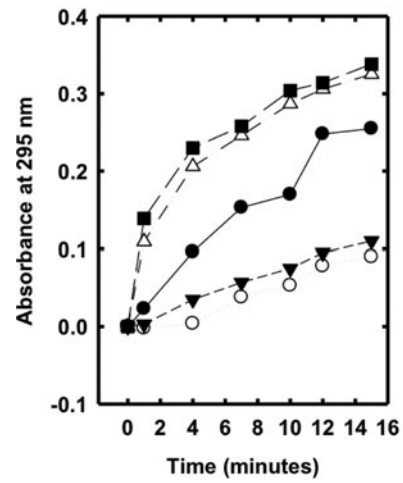

**SUPPLEMENTARY FIG. S2.** RNase refolding over time with hBCAT +/- protein disulphide isomerase (PDI). PDI and each respective hBCAT isoform were incubated with rdRNase ( $30 \mu M$ ), and aliquots were removed at 24 h to determine the effect on RNase folding. Change in absorbance at 295 nm over time for PDI (●), hBCATc (○), hBCATm (▼), PDI+hBCATc (△), and PDI+hBCATm (■). Graph is representative of three independent runs.
