# Supplementary material
Source: PubMed Central journal article supplement (PMC4026213)
Supplement: Supp_Fig3.pdf [file Supp_Fig3.pdf]

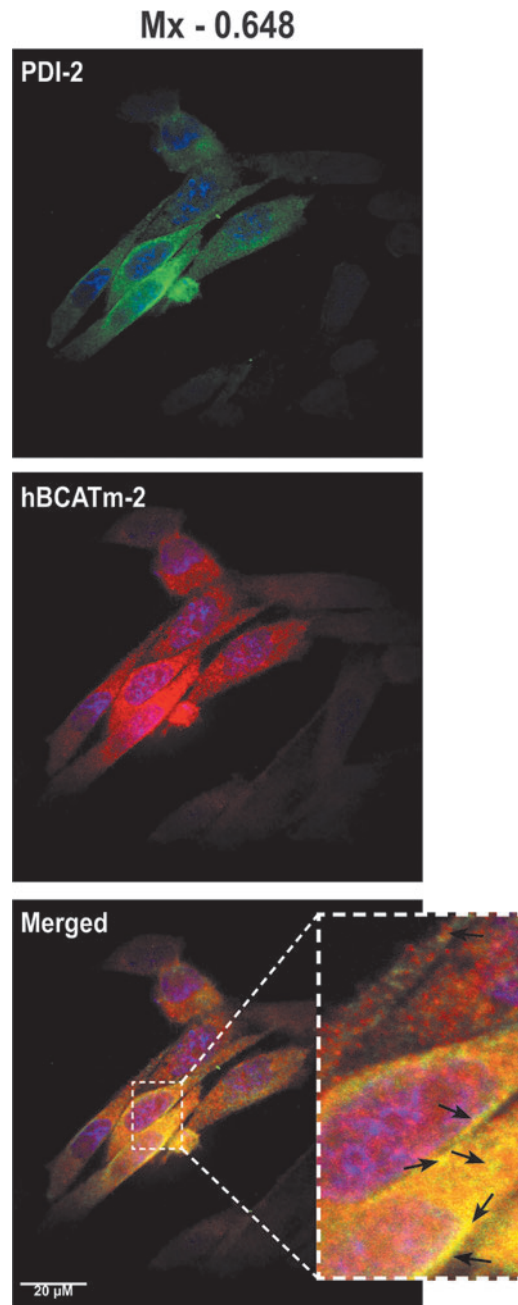

**SUPPLEMENTARY FIG. S3. The mitochondrial hBCAT co-localizes with PDI and Mia40.** IMR-32 cells were fixed for immunostaining as described in the “Materials and Methods” section using primary antibodies: anti-hBCATm-2 and anti-PDI-2 (1/250 dilution). Secondary antibodies: goat anti-rabbit Alex Fluor 568 (anti-PDI-2 [1/500 dilution]) and goat anti-mouse Alex Fluor 488 (hBCATm-2, [1/500 dilution]). Slides were washed and mounted in 300 nM 4',6' diamino-2-phenylindole (DAPI) in glycerol. Mander’s correlation coefficient (Mx) was used to statistically assess the co-localization of hBCAT with PDI. PDI (Green) + hBCATm (red). Merged images show yellow where co-localization is observed, as indicated by the arrows. Scale bar (20  $\mu$ m).
