# Supplementary material
Source: PubMed Central journal article supplement (PMC4026213)
Supplement: Supp_Fig4.pdf [file Supp_Fig4.pdf]

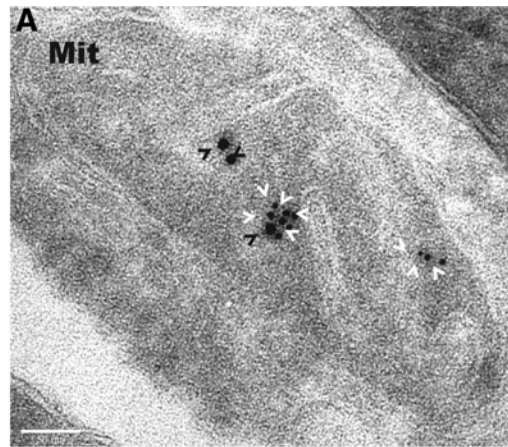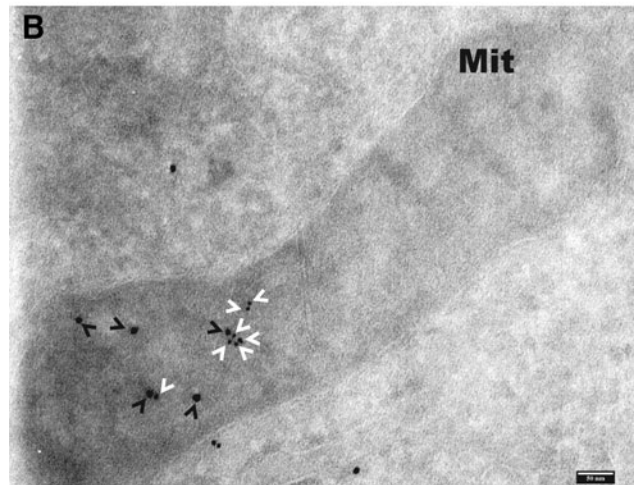

**SUPPLEMENTARY FIG. S4. Localization of hBCATm, Mia40, and PDI in the mitochondria.** Electron micrograph of IMR-32 cells expressing (A) hBCATm, and PDI labeled with anti-rabbit-10 nm (anti-hBCATm-3—*black arrowheads*) and anti-mouse-6 nm (anti-PDI-1—*white arrowheads*), detected by gold-conjugated secondary antibodies (antibody dilution 1/20). (B) IMR-32 cells treated with 100  $\mu$ M hydrogen peroxide for 30 min were prepared for electron microscopy as described in the “Materials and Methods” section. Here, hBCATm and PDI were labeled with anti-rabbit-10 nm (hBCATm-1—*black arrowheads*) and anti-mouse-6 nm (PDI-1—*white arrowheads*), detected by gold-conjugated secondary antibodies (antibody dilution 1/20). Scale bar: A and B (50 nm).
