# Supplementary material
Source: PubMed Central journal article supplement (PMC4026213)
Supplement: Supp_Table1.pdf [file Supp_Table1.pdf]

SUPPLEMENTARY TABLE S1. ANTIBODIES USED IN THIS STUDY

| <i>Ab against</i> | <i>Origin</i> | <i>Species of AB</i> | <i>Clone</i> | <i>Application</i>    | <i>Source</i>                                    | <i>Abbreviation in text</i> | <i>Comments</i>                                              |
|-------------------|---------------|----------------------|--------------|-----------------------|--------------------------------------------------|-----------------------------|--------------------------------------------------------------|
| PDI               | Rat           | Mouse                | Monoclonal   | ICC, EM               | Abcam, No. ab2792                                | Anti-PDI-1                  | —                                                            |
| PDI               | Human         | Rabbit               | Polyclonal   | ICC, FWB, IP, EM, IHC | BioVision, No. 5601-100                          | Anti-PDI-2                  | —                                                            |
| BCATm             | Human         | Rabbit               | Polyclonal   | ICC, WB, FWB, EM      | Insight Biotechnology                            | Anti-hBCATm-1               | —                                                            |
| BCATm             | Human         | Mouse                | Polyclonal   | ICC, WB, IP, EM       | Sigma, No. sab1400023                            | Anti-hBCATm-2               | —                                                            |
| BCATm             | Human         | Rabbit               | Polyclonal   | EM, IHC               | Abcam, No. ab95976                               | Anti-hBCATm-3               | —                                                            |
| BCATc             | Human         | Rabbit               | Polyclonal   | ICC, WB, FWB,         | Insight Biotechnology                            | Anti-hBCATc-1               | —                                                            |
| BCATc             | Human         | Rabbit               | Polyclonal   | IHC                   | Abcam, No. ab107191                              | Anti-hBCATc-2               | —                                                            |
| IgG               | —             | Rabbit               | Monoclonal   | IP                    | New England Biolabs, No. 3900S                   | —                           | —                                                            |
| Mia40             | Human         | Rabbit               | Polyclonal   | ICC, EM               | Abgent, ap11528b                                 | Anti-hMia40                 | —                                                            |
| Rabbit IgG        | Goat          | Rabbit               | —            | WB, FWB               | Invitrogen, No. 65-6120                          | —                           | IgG H+L, Highly cross-adsorbed                               |
| Rabbit IgG        | Goat          | Rabbit               | —            | ICC                   | Invitrogen, No. a11036                           | —                           | Alexa Fluor <sup>®</sup> 568 IgG (H+L) highly cross-adsorbed |
| Mouse IgG         | Goat          | Mouse                | —            | ICC                   | Invitrogen, No. a11029                           | —                           | Alexa Fluor 488 IgG (H+L) highly cross-adsorbed              |
| Mouse IgG         | Horse         | Mouse                | —            | WB                    | New England Biolabs, No. 7076S                   | —                           | IgG H+L                                                      |
| Rabbit IgG        | Rabbit        | Mouse                | Monoclonal   | WB                    | New England Biolabs, No. 3677s                   | —                           | Light-chain specific                                         |
| Rabbit IgG        | Donkey        | Rabbit               | —            | EM                    | Aurion, No 700.000 (Conventional kit DAR6/DAR10) | —                           | 6 & 10 nm gold conjugated, highly cross-adsorbed             |
| Mouse IgG         | Donkey        | Mouse                | —            | EM                    | Aurion, No 700.000 (Conventional kit DAR6/DAR10) | —                           | 6 & 10 nm gold conjugated, highly cross-adsorbed             |

Ab, antibody; EM, electron microscopy; FWB, far-Western blot; ICC, immunocytochemistry; IHC, immunohistochemistry; IP, immunoprecipitation; WB, Western blot.
